# Supplementary material for: Improving the electroluminescence performance of blue light-emitting poly(fluorene-co-dibenzothiophene-S,S-dioxide) by tuning the intra-molecular charge transfer effects and temperature-induced orientation of the emissive layer structure
Source: Royal Society of Chemistry journal article supplement (doi:10.1039/c9tc00842j), 2019-01-01
Supplement: c9tc00842j1.pdf [file c9tc00842j1.pdf]

## Supporting Information

### **Improving electroluminescent performance of blue light-emitting poly(fluorene-*co*-dibenzothiophene-*S,S*-dioxide) by tuning the intramolecular charge transfer effects and temperature-induced orientation of the emissive layer structure**

Liwen Hu,<sup>ab</sup> Junfei Liang,<sup>ac</sup> Wenkai Zhong,<sup>a</sup> Ting Guo,<sup>\*a</sup> Zhiming Zhong,<sup>ab</sup> Feng Peng,<sup>ab</sup> Baobing Fan,<sup>ab</sup> Lei Ying,<sup>\*a</sup> and Yong Cao<sup>a</sup>

*<sup>a</sup>Institute of Polymer Optoelectronic Materials and Devices, State Key Laboratory of Luminescent Materials and Devices, South China University of Technology, Guangzhou 510640, China*

*<sup>b</sup>South China Institute of Collaborative Innovation, Dongguan 523808, China*

*<sup>c</sup>School of Environment and Civil Engineering, Dongguan University of Technology, Dongguan 523808, China*

**Table S1** Photophysical properties of copolymers

| Polymer   | Toluene                |                       |      | Chloroform             |                       |      | $\phi_{\text{PL}}$<br>(%) |
|-----------|------------------------|-----------------------|------|------------------------|-----------------------|------|---------------------------|
|           | $\lambda_{\text{abs}}$ | $\lambda_{\text{PL}}$ | FWHM | $\lambda_{\text{abs}}$ | $\lambda_{\text{PL}}$ | FWHM |                           |
|           | (nm)                   | (nm)                  | (nm) | (nm)                   | (nm)                  | (nm) |                           |
| PFSO10    | 389                    | 430                   | 48   | 392                    | 446                   | 65   | 63                        |
| PFTA1SO10 | 388                    | 430                   | 52   | 390                    | 446                   | 67   | 40                        |
| PFTA2SO10 | 387                    | 430                   | 55   | 390                    | 448                   | 69   | 42                        |
| PFTA3SO10 | 387                    | 430                   | 60   | 388                    | 446                   | 82   | 42                        |
| PFSO10TA1 | 386                    | 429                   | 50   | 388                    | 445                   | 64   | 49                        |
| PFSO10TA2 | 386                    | 429                   | 51   | 389                    | 447                   | 65   | 56                        |
| PFSO10TA3 | 386                    | 430                   | 53   | 388                    | 448                   | 77   | 49                        |

**Table S2** EL performance of copolymers

| Polymer   | $V_{\text{turn-on}}^{\text{a}}$ | $LE_{\text{max}}$<br>(cd/A) | $EQE_{\text{max}}$<br>(%) | $L_{\text{max}}$<br>( $\text{cd/m}^2$ ) | $\text{CIE}^{\text{b}}$ |
|-----------|---------------------------------|-----------------------------|---------------------------|-----------------------------------------|-------------------------|
| PFSO10    | 4.0                             | 2.2                         | 1.9                       | 5586                                    | (0.16,0.13)             |
| PFTA1SO10 | 3.8                             | 4.7                         | 3.7                       | 9688                                    | (0.16,0.15)             |
| PFTA2SO10 | 3.6                             | 4.3                         | 3.4                       | 8240                                    | (0.16,0.17)             |
| PFTA3SO10 | 3.4                             | 4.0                         | 2.7                       | 7455                                    | (0.16,0.20)             |
| PFSO10TA1 | 3.8                             | 4.5                         | 3.5                       | 11141                                   | (0.16,0.14)             |
| PFSO10TA2 | 3.6                             | 5.2                         | 4.4                       | 9591                                    | (0.16,0.15)             |
| PFSO10TA3 | 3.4                             | 3.8                         | 2.9                       | 6610                                    | (0.16,0.18)             |

<sup>a</sup> The device structure: ITO/PEDOT:PSS/polymer/CsF/Al, the emissive layer was pretreated at thermal annealing temperature of 80 °C. <sup>b</sup> Measured at current density of 12 mA cm<sup>-2</sup>.

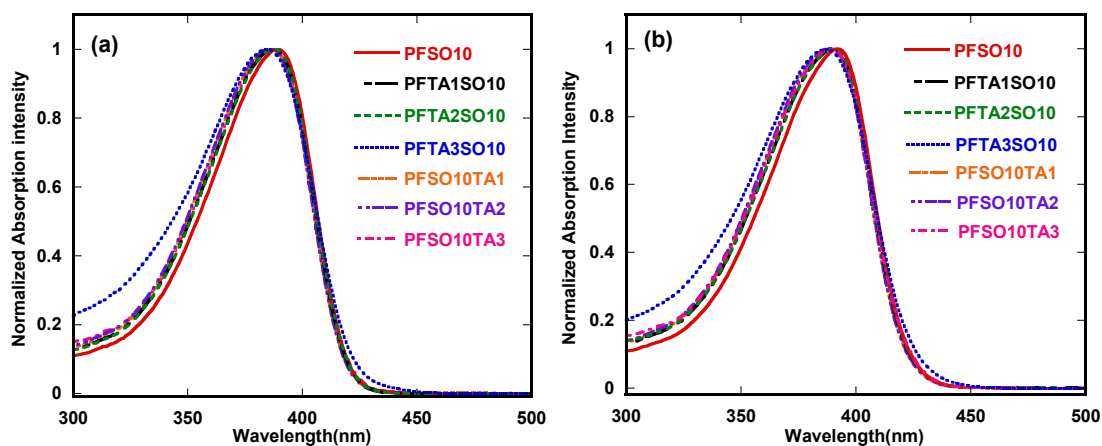

**Fig.S1** UV-vis absorption spectra of copolymers in toluene (a) and solid film (b).

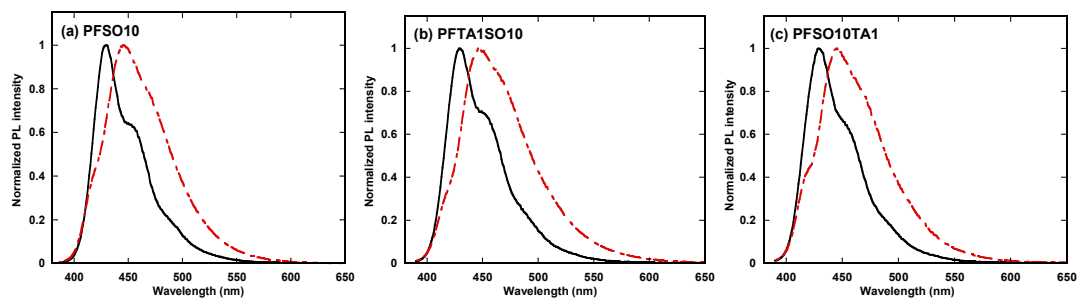

**Fig. S2** PL spectra of copolymers in toluene (real line) and chloroform (dotted line).

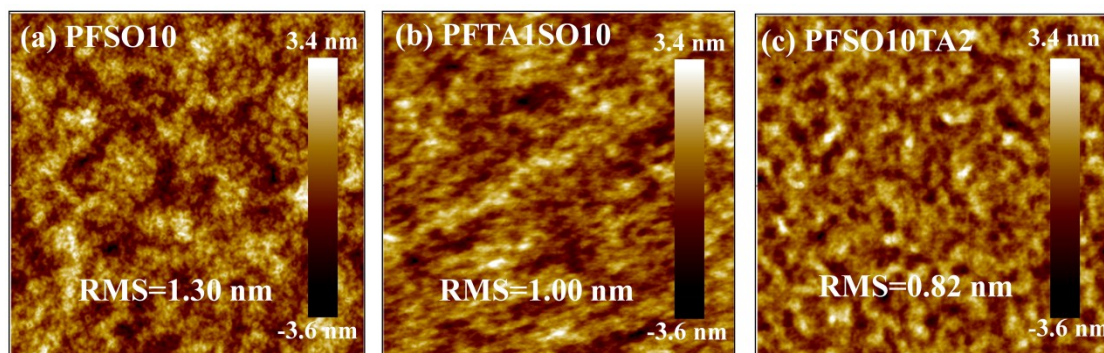

**Fig. S3** AFM image ( $5\mu\text{m} \times 5\mu\text{m}$ ) of the copolymers thermal annealed at 80°C for 10 min.

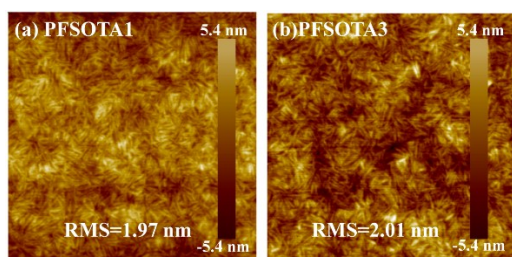

**Fig. S4** AFM image ( $5\mu\text{m}\times 5\mu\text{m}$ ) of the copolymers thermal annealed at  $115^\circ\text{C}$  for 10min.

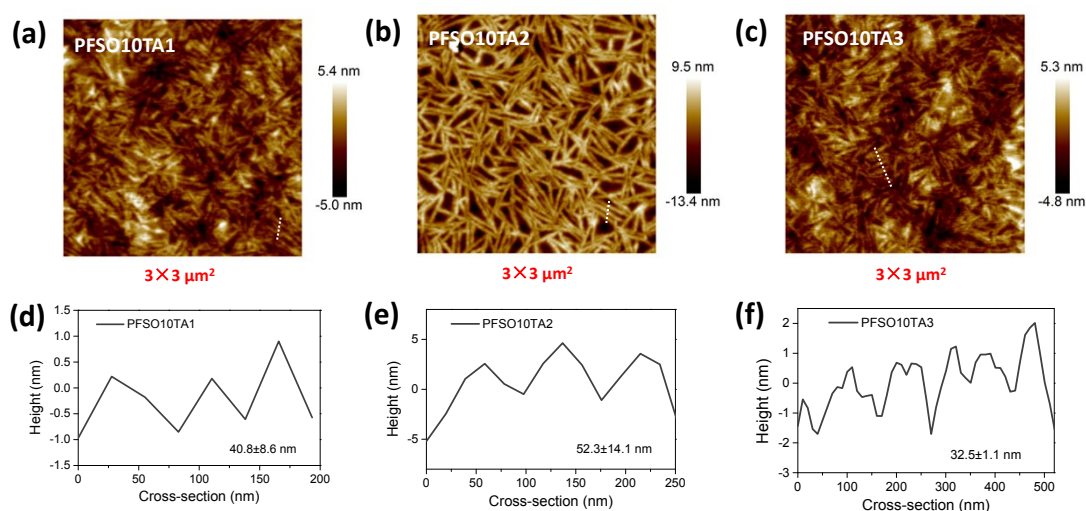

**Fig. S5** (a-c) The AFM images ( $3\mu\text{m}\times 3\mu\text{m}$ ) of copolymer films after annealing at  $115^\circ\text{C}$  for 10 min; (d-f) the cross-section profiles of the dashed line in (a-c).

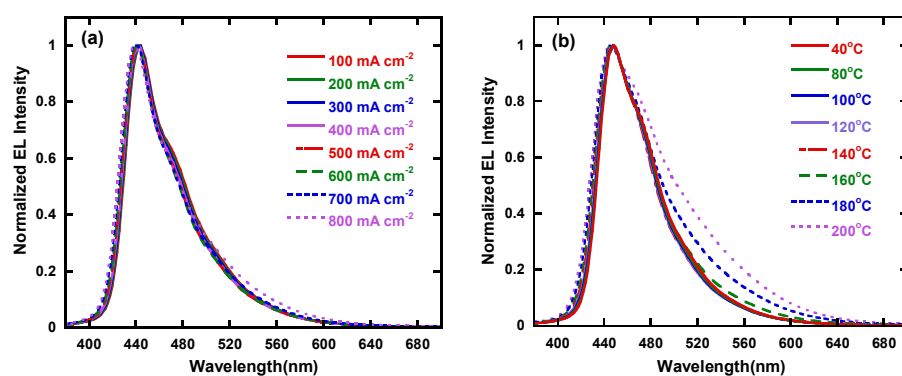

**Fig. S6** EL spectra of polymer PFSO10 at different current density and different temperature.
